# Supplementary material
Source: ML conference proceedings conference paper supplement (https://openreview.net/forum?id=npxQKeYHw7)

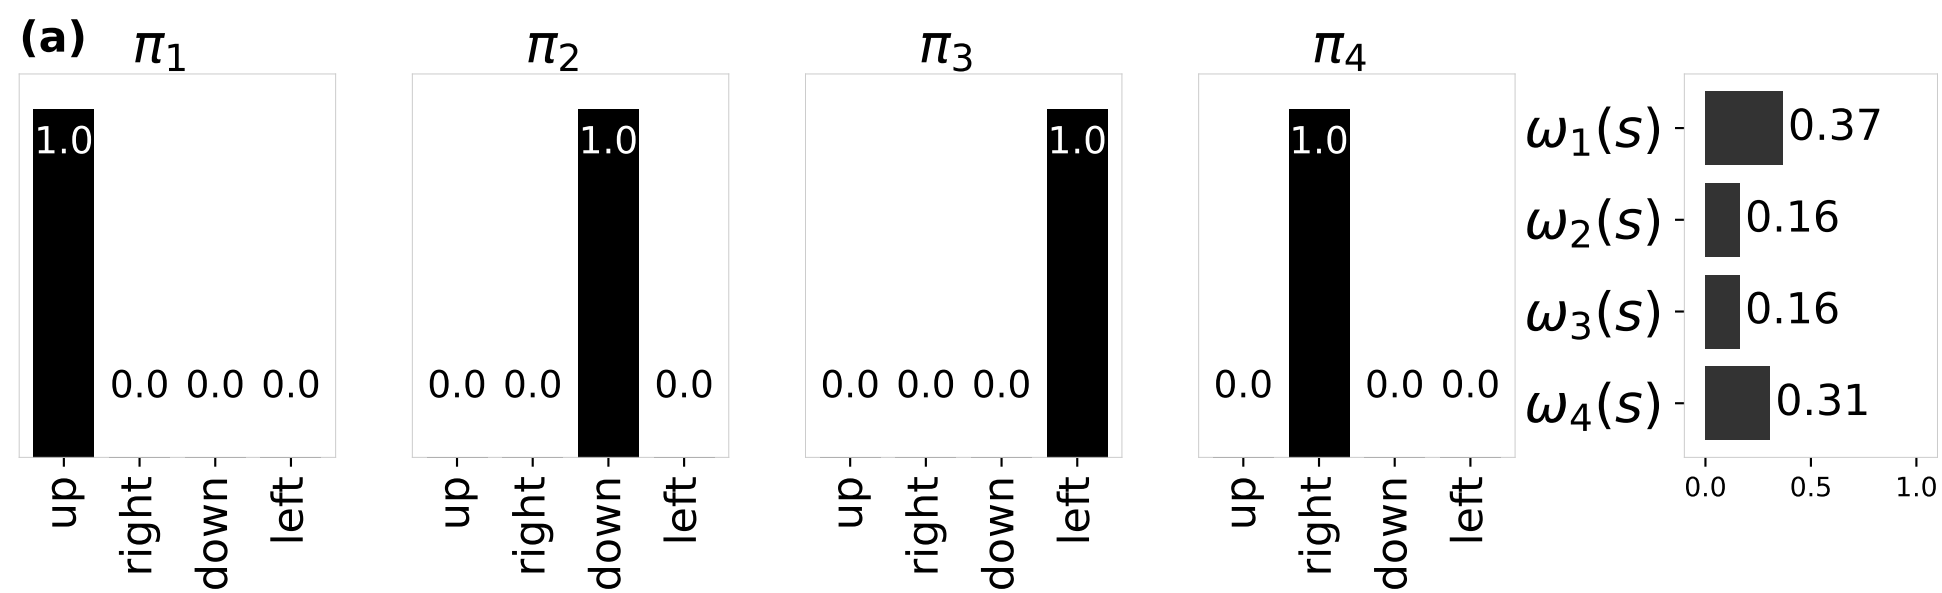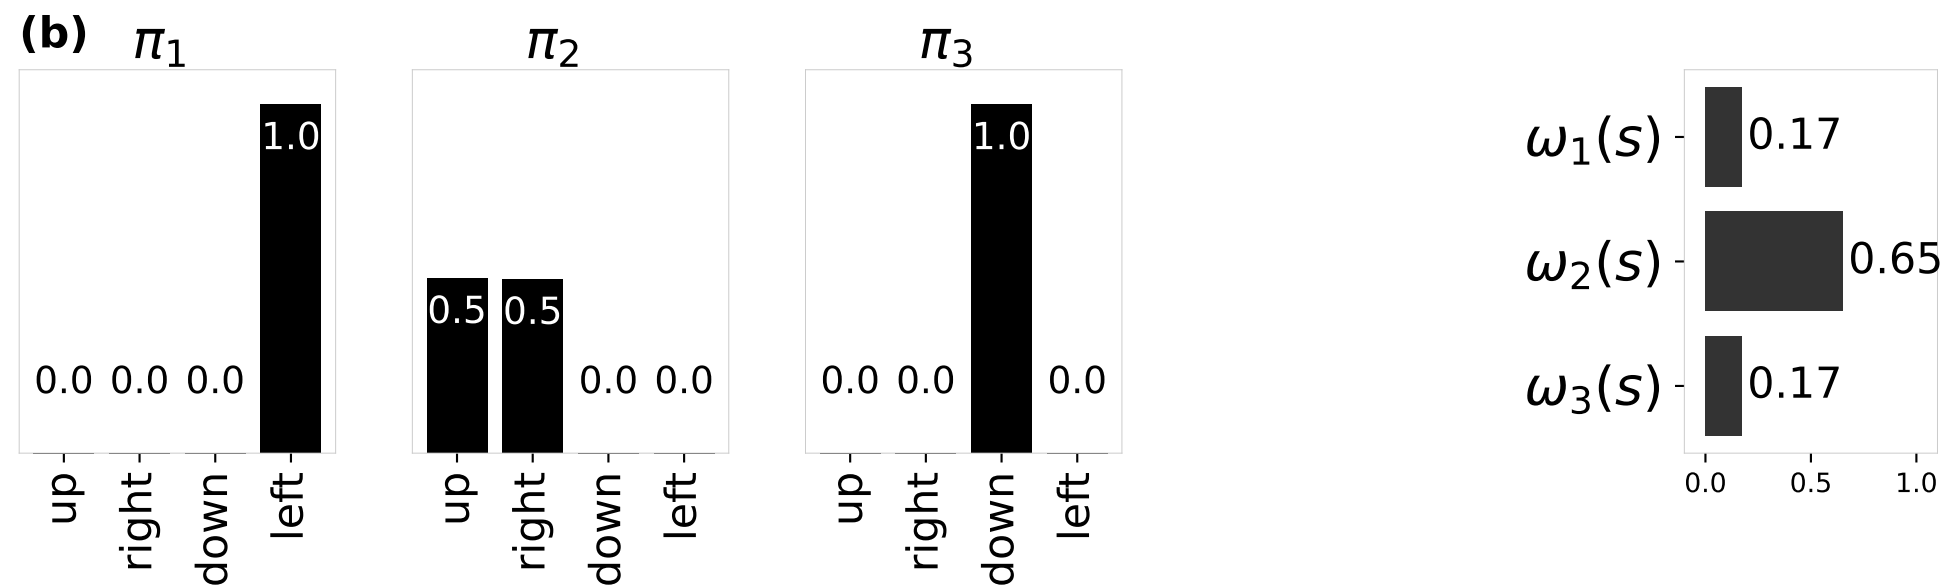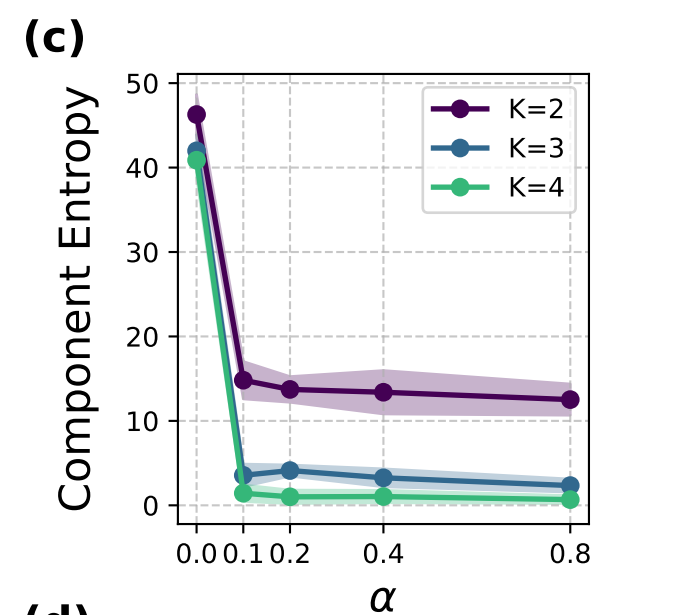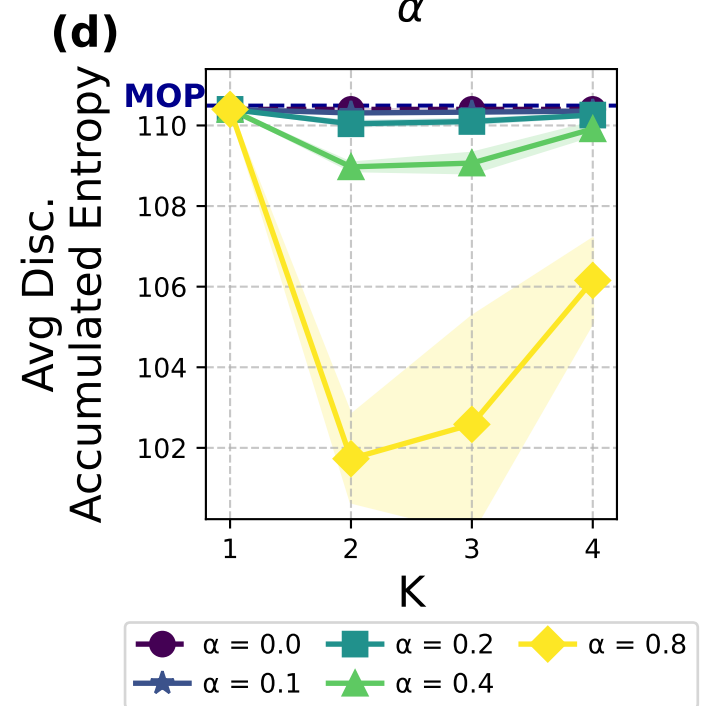

Supplement: supplementary_material [file discrete_figure.pdf › code/discrete/discrete_figure.pdf]
